# Supplementary material for: RNA sequencing analysis of embryos exposed to nanoplastics: effects on developmental and transcriptomic alteration
Source: Research Square preprint supplement (doi:10.21203/rs.3.rs-7248509/v1), 2025-09-05
Supplement: Supplementary file 1 [file fe38862713b6b494790236ac.docx]

**Supplementary Material**

**Supplementary Figure 1. Hierarchical clustering heatmaps of differentially expressed genes (DEGs) between PMMA NP-treated and control embryos.** (a) Clustering of samples exposed to 0.1 mg/mL PMMA NPs and control. (b) Clustering of samples exposed to 1 mg/mL PMMA NPs and control. Each column represents a biological replicate, and each row corresponds to a gene. Color scale indicates Z-score of gene expression (red: up-regulated, blue: down-regulated). Treatement groups show clear separation from control samples, indicating consistent and treatment-specific transcriptional responses.

**
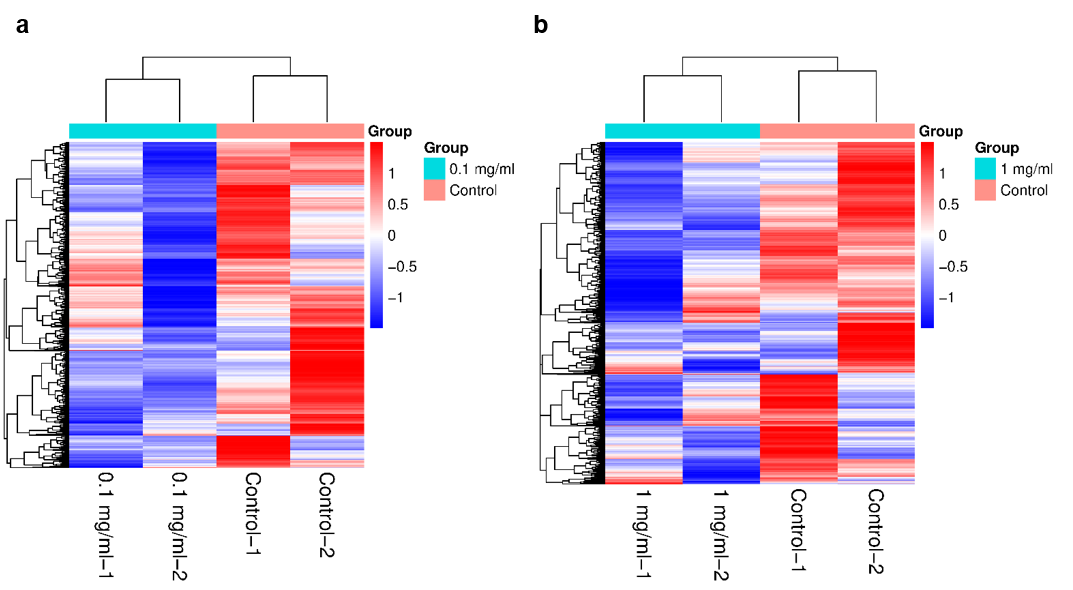
**

**Supplementary Table 1.** Top 20 enriched clusters with representative ontology terms of 0.1 mg/mL treated NPs group.

| **GO** | **Category** | **Description** | **Count** | **%** | **Log10 (FDR)** |
| --- | --- | --- | --- | --- | --- |
| R-MMU-9841922 | Reactome Gene Sets | MLL4 and MLL3 complexes regulate expression of PPARG target genes in adipogenesis and hepatic steatosis | 11 | 2.00 | -5.69 |
| GO:0006974 | GO Biological Processes | DNA damage response | 39 | 7.10 | -4.06 |
| GO:0033173 | GO Biological Processes | calcineurin-NFAT signaling cascade | 5 | 0.91 | -3.89 |
| GO:0048589 | GO Biological Processes | developmental growth | 31 | 5.65 | -3.83 |
| GO:0031669 | GO Biological Processes | cellular response to nutrient levels | 18 | 3.28 | -3.60 |
| GO:0016239 | GO Biological Processes | positive regulation of macroautophagy | 10 | 1.82 | -3.60 |
| GO:0007264 | GO Biological Processes | small GTPase-mediated signal transduction | 17 | 3.10 | -3.58 |
| R-MMU-8876198 | Reactome Gene Sets | RAB GEFs exchange GTP for GDP on RABs | 9 | 1.64 | -3.37 |
| GO:0098780 | GO Biological Processes | response to mitochondrial depolarisation | 3 | 0.55 | -3.25 |
| mmu00601 | KEGG Pathway | Glycosphingolipid biosynthesis - lacto and neolacto series - Mus musculus (house mouse) | 5 | 0.91 | -3.24 |
| GO:0031579 | GO Biological Processes | membrane raft organization | 5 | 0.91 | -3.16 |
| GO:0090110 | GO Biological Processes | COPII-coated vesicle cargo loading | 4 | 0.73 | -3.09 |
| GO:0040009 | GO Biological Processes | regulation of growth rate | 3 | 0.55 | -3.05 |
| GO:0040008 | GO Biological Processes | regulation of growth | 32 | 5.83 | -2.92 |
| GO:1902475 | GO Biological Processes | L-alpha-amino acid transmembrane transport | 7 | 1.28 | -2.88 |
| GO:0071407 | GO Biological Processes | cellular response to organic cyclic compound | 28 | 5.10 | -2.87 |
| GO:0007422 | GO Biological Processes | peripheral nervous system development | 8 | 1.46 | -2.85 |
| GO:1903580 | GO Biological Processes | positive regulation of ATP metabolic process | 6 | 1.09 | -2.84 |
| GO:0006289 | GO Biological Processes | nucleotide-excision repair | 6 | 1.09 | -2.84 |
| GO:0031570 | GO Biological Processes | DNA integrity checkpoint signaling | 10 | 1.82 | -2.80 |

**Supplementary Table 2.** Top 20 enriched clusters with representative ontology terms of 1 mg/mL treated NPs group.

| **GO** | **Category** | **Description** | **Count** | **%** | **Log10 (FDR)** |
| --- | --- | --- | --- | --- | --- |
| R-MMU-212436 | Reactome Gene Sets | Generic Transcription Pathway | 40 | 7.38 | -4.81 |
| R-MMU-9842860 | Reactome Gene Sets | Regulation of endogenous retroelements | 10 | 1.85 | -3.91 |
| GO:0001701 | GO Biological Processes | in utero embryonic development | 29 | 5.35 | -3.40 |
| GO:0002638 | GO Biological Processes | negative regulation of immunoglobulin production | 4 | 0.74 | -3.33 |
| GO:0045765 | GO Biological Processes | regulation of angiogenesis | 19 | 3.51 | -3.19 |
| GO:0001825 | GO Biological Processes | blastocyst formation | 7 | 1.29 | -3.08 |
| GO:0042138 | GO Biological Processes | meiotic DNA double-strand break formation | 3 | 0.55 | -3.07 |
| mmu04218 | KEGG Pathway | Cellular senescence - Mus musculus (house mouse) | 13 | 2.40 | -3.07 |
| GO:0008593 | GO Biological Processes | regulation of Notch signaling pathway | 9 | 1.66 | -3.00 |
| GO:0002065 | GO Biological Processes | columnar/cuboidal epithelial cell differentiation | 11 | 2.03 | -2.96 |
| GO:0071287 | GO Biological Processes | cellular response to manganese ion | 3 | 0.55 | -2.90 |
| GO:0019725 | GO Biological Processes | cellular homeostasis | 33 | 6.09 | -2.89 |
| GO:2001242 | GO Biological Processes | regulation of intrinsic apoptotic signaling pathway | 13 | 2.40 | -2.81 |
| GO:1902459 | GO Biological Processes | positive regulation of stem cell population maintenance | 6 | 1.11 | -2.78 |
| GO:0032594 | GO Biological Processes | protein transport within lipid bilayer | 3 | 0.55 | -2.76 |
| R-MMU-159782 | Reactome Gene Sets | Removal of aminoterminal propeptides from gamma-carboxylated proteins | 3 | 0.55 | -2.76 |
| R-MMU-176187 | Reactome Gene Sets | Activation of ATR in response to replication stress | 5 | 0.92 | -2.73 |
| mmu05012 | KEGG Pathway | Parkinson disease - Mus musculus (house mouse) | 16 | 2.95 | -2.70 |
| GO:0045910 | GO Biological Processes | negative regulation of DNA recombination | 6 | 1.11 | -2.64 |
| GO:0009143 | GO Biological Processes | nucleoside triphosphate catabolic process | 3 | 0.55 | -2.51 |

**Supplementary Table 3.** Functional enrichment of MCODE protein interaction modules after 0.1 mg/mL NPs treatment.

| **MCODE** | **GO** | **Description** | **Log10 (FDR)** |
| --- | --- | --- | --- |
| MCODE_1 | R-MMU-9018519 | Estrogen-dependent gene expression | -13.5 |
| MCODE_1 | R-MMU-4839726 | Chromatin organization | -13.3 |
| MCODE_1 | R-MMU-3247509 | Chromatin modifying enzymes | -13.3 |
| MCODE_2 | GO:0010498 | proteasomal protein catabolic process | -4.1 |
| MCODE_2 | GO:0051603 | proteolysis involved in protein catabolic process | -3.5 |
| MCODE_2 | GO:0043161 | proteasome-mediated ubiquitin-dependent protein catabolic process | -3.0 |
| MCODE_3 | R-MMU-212436 | Generic Transcription Pathway | -4.3 |
| MCODE_3 | R-MMU-73894 | DNA Repair | -4.0 |
| MCODE_3 | R-MMU-69278 | Cell Cycle, Mitotic | -3.4 |
| MCODE_4 | GO:0043087 | regulation of GTPase activity | -6.9 |
| MCODE_4 | GO:0043547 | positive regulation of GTPase activity | -5.2 |
| MCODE_4 | GO:0051336 | regulation of hydrolase activity | -5.0 |
| MCODE_5 | mmu04110 | Cell cycle - Mus musculus (house mouse) | -10.7 |
| MCODE_5 | R-MMU-176408 | Regulation of APC/C activators between G1/S and early anaphase | -10.5 |
| MCODE_5 | R-MMU-174143 | APC/C-mediated degradation of cell cycle proteins | -9.2 |
| MCODE_6 | mmu00601 | Glycosphingolipid biosynthesis - lacto and neolacto series - Mus musculus (house mouse) | -8.1 |
| MCODE_6 | GO:0006486 | protein glycosylation | -8.0 |
| MCODE_6 | GO:0043413 | macromolecule glycosylation | -8.0 |
| MCODE_7 | GO:0120035 | regulation of plasma membrane bounded cell projection organization | -3.7 |
| MCODE_7 | GO:0031344 | regulation of cell projection organization | -3.7 |
| MCODE_9 | GO:0090110 | COPII-coated vesicle cargo loading | -9.4 |
| MCODE_9 | GO:0035459 | vesicle cargo loading | -8.7 |
| MCODE_9 | GO:0090114 | COPII-coated vesicle budding | -8.5 |
| MCODE_10 | R-MMU-983189 | Kinesins | -7.9 |
| MCODE_10 | R-MMU-6811434 | COPI-dependent Golgi-to-ER retrograde traffic | -7.1 |
| MCODE_10 | R-MMU-2132295 | MHC class II antigen presentation | -6.7 |

**Supplementary Table 4.** Functional enrichment of MCODE protein interaction modules after 1 mg/mL NPs treatment.

| **MCODE** | **GO** | **Description** | **Log10 (FDR)** |
| --- | --- | --- | --- |
| MCODE_1 | R-MMU-8878171 | Transcriptional regulation by RUNX1 | -18.9 |
| MCODE_1 | R-MMU-8936459 | RUNX1 regulates genes involved in megakaryocyte differentiation and platelet function | -18.6 |
| MCODE_1 | R-MMU-3214858 | RMTs methylate histone arginines | -16.0 |
| MCODE_2 | GO:0010498 | proteasomal protein catabolic process | -8.2 |
| MCODE_2 | GO:0051603 | proteolysis involved in protein catabolic process | -7.4 |
| MCODE_2 | GO:0043161 | proteasome-mediated ubiquitin-dependent protein catabolic process | -6.2 |
| MCODE_3 | R-MMU-6799198 | Complex I biogenesis | -12.7 |
| MCODE_3 | GO:0010257 | NADH dehydrogenase complex assembly | -12.6 |
| MCODE_3 | GO:0032981 | mitochondrial respiratory chain complex I assembly | -12.6 |
| MCODE_5 | R-MMU-9639288 | Amino acids regulate mTORC1 | -10.5 |
| MCODE_5 | R-MMU-9711097 | Cellular response to starvation | -10.5 |
| MCODE_5 | mmu04966 | Collecting duct acid secretion - Mus musculus (house mouse) | -8.1 |
| MCODE_6 | R-MMU-9035034 | RHOF GTPase cycle | -11.1 |
| MCODE_6 | R-MMU-9012999 | RHO GTPase cycle | -7.0 |
| MCODE_6 | R-MMU-194315 | Signaling by Rho GTPases | -6.3 |
| MCODE_7 | R-MMU-389356 | Co-stimulation by CD28 | -7.4 |
| MCODE_7 | R-MMU-388841 | Regulation of T cell activation by CD28 family | -7.0 |
| MCODE_7 | R-MMU-9006934 | Signaling by Receptor Tyrosine Kinases | -4.6 |
| MCODE_8 | R-MMU-397014 | Muscle contraction | -5.8 |
| MCODE_8 | GO:0006936 | muscle contraction | -5.4 |
| MCODE_8 | GO:0003012 | muscle system process | -5.1 |
| MCODE_10 | R-MMU-212436 | Generic Transcription Pathway | -4.3 |
| MCODE_11 | mmu01232 | Nucleotide metabolism - Mus musculus (house mouse) | -7.2 |
| MCODE_11 | WP2185 | Purine metabolism | -6.3 |
| MCODE_11 | GO:0009259 | ribonucleotide metabolic process | -5.5 |
